# Supplementary material for: Serum CXCL5 level is associated with tumor progression in penile cancer
Source: Oxford University Press journal article supplement (doi:10.1042/bsr20202133), 2021-01-01
Supplement: bsr-2020-2133_supp.pdf [file bsr-2020-2133_supp.pdf]

## Supplementary Figures

Figure S1

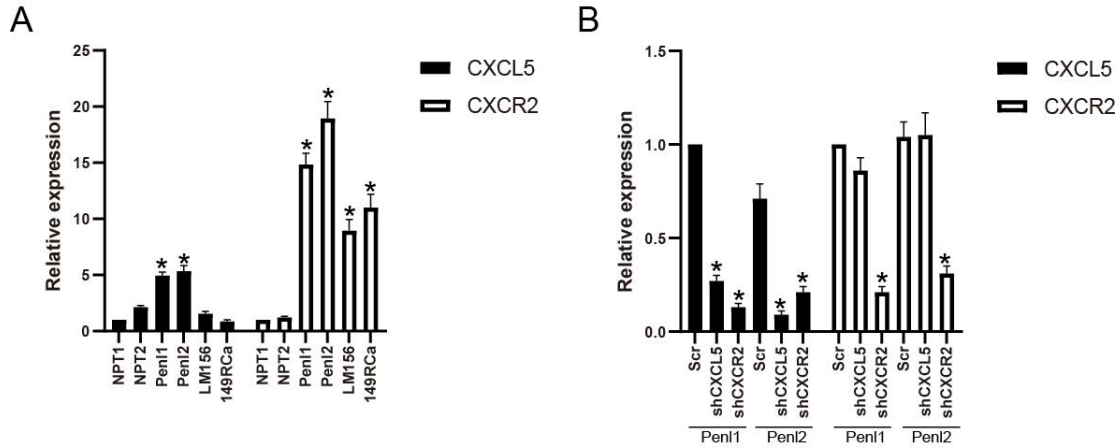

**Figure S1.** Densitometric analysis and subsequent statistical analysis for **Fig 5B** and **Fig 6A**. **A.** Densitometric analysis and subsequent statistical analysis for Fig. 5B. \* $P < 0.05$ , as compared with NPT1 and NPT2. **B.** Densitometric analysis and subsequent statistical analysis for Fig. 6A. \* $P < 0.05$ , as compared with Scr control in Pen1 or Pen2, respectively.

Figure S2

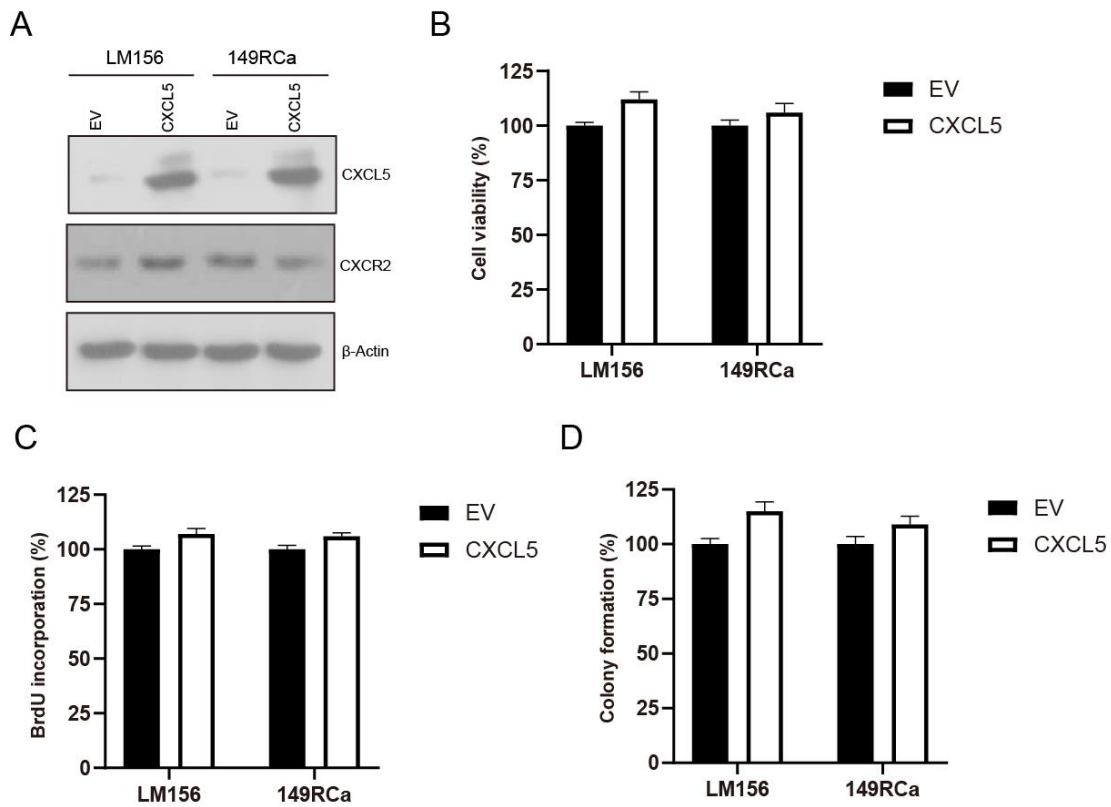

**Figure S2.** Over-expression of CXCL5 mildly affected cell proliferation and clonogenesis in in LM156 and 149RCa cells. **A.** Over-expression of CXCL5 in LM156 and 149RCa cells. **B.** Over-expression of CXCL5 mildly affected cell growth of PC cell lines. The cell viability in empty vector (EV) control was regards as 100%. **C.** Over-expression of CXCL5 mildly affected BrdU incorporation in PC cell lines. The BrdU incorporation in empty vector (EV) control was regards as 100%. **D.** Over-expression of CXCL5 mildly affected colony formation in LM156 and 149RCa cells. The colony formation in empty vector (EV) control was regards as 100%.

Figure S3

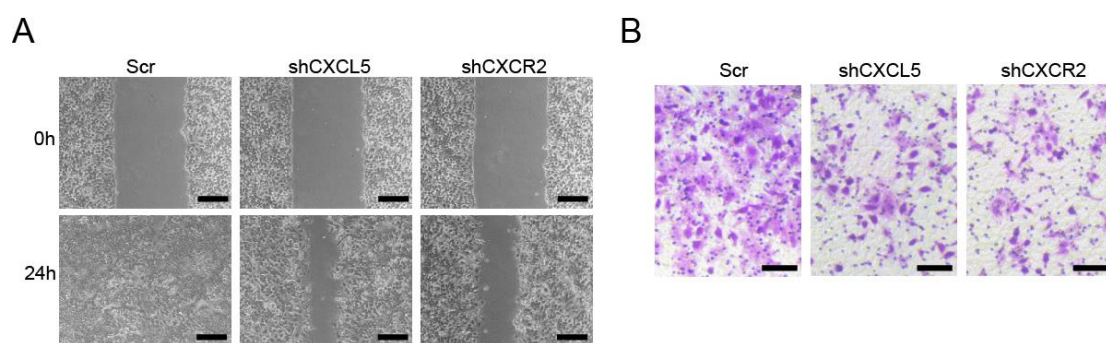

**Figure S3.** Knockdown of CXCL5 or CXCR2 expression inhibited cell migration and transwell invasion of Pen1 cells. **A.** Knockdown of CXCL5 or CXCR2 expression inhibited cell migration of Pen1 cells. Bars: 100  $\mu$ m. **B.** Knockdown of CXCL5 or CXCR2 expression inhibited transwell invasion of Pen1 cells. Bars: 50  $\mu$ m.

Figure S4

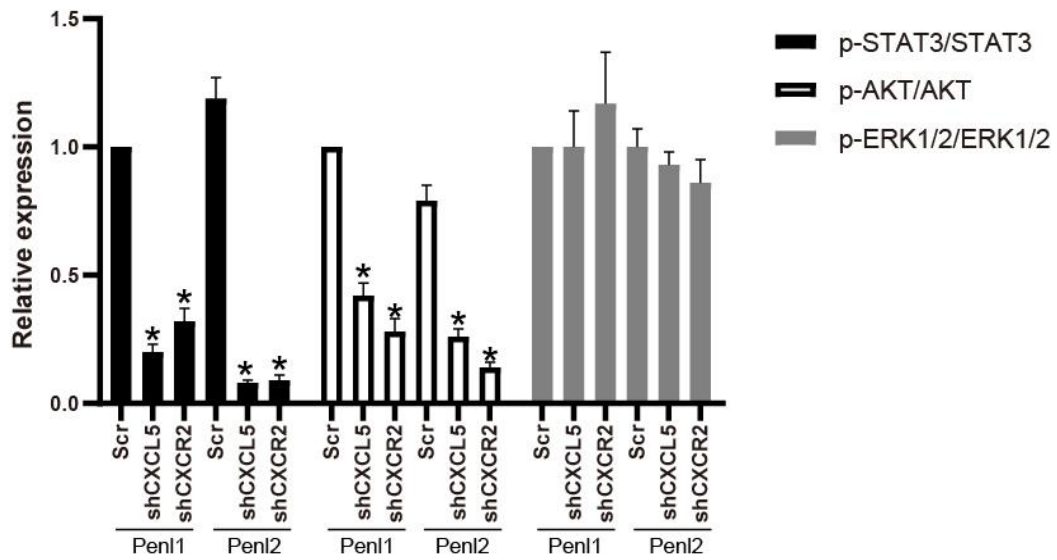

**Figure S4.**Densitometric analysis and subsequent statistical analysis for **Fig. 8A**. \*P<0.05, as compared with Scr control in Pen1 or Pen2, respectively.
